# Supplementary material for: B–NHL Cases in a Tertiary Pediatric Hematology—Oncology Department: A 20-Year Retrospective Cohort Study
Source: MDPI journal article supplement (doi:10.3390/life14050633), 2024-05-16
Supplement: s1 [file s1]

**Table S1.** Characteristics of the B-NHL cohort by subtype.

|                             | B-NHL cohort | BL   | PMBCL | DLBCL | BLL  | FL   |
|-----------------------------|--------------|------|-------|-------|------|------|
| Murphy staging              |              |      |       |       |      |      |
| Stage I                     | 6%           | -    | -     | 50%   | -    | -    |
| Stage II                    | 12%          | 20%  | -     | -     | -    | -    |
| Stage III                   | 53%          | 60%  | 100%  | -     | -    | 100% |
| Stage IV                    | 29%          | 20%  | -     | 50%   | 100% | -    |
| FAB/LMB risk stratification |              |      |       |       |      |      |
| A                           | -            | -    | -     | -     | -    | -    |
| B                           | 87%          | 80%  | 100%  | 100%  | 100% | 100% |
| C                           | 13%          | 20%  | -     | -     | -    | -    |
| BFM risk stratification     |              |      |       |       |      |      |
| R1                          | -            | -    | -     | -     | -    | -    |
| R2                          | 53%          | 50%  | 100%  | -     | 50%  | 100% |
| R3                          | 20%          | 10%  | -     | 100%  | 50%  | -    |
| R4                          | 27%          | 40%  | -     | -     | -    | -    |
| Histology markers §         |              |      |       |       |      |      |
| BCL2+                       | 27%          | -    | 100%  | 100%  | 100% | -    |
| BCL6+                       | 82%          | 85%  | 100%  | 100%  | -    | 100% |
| CD30+                       | 25%          | -    | 100%  | -     | -    | -    |
| cMYC+                       | 65%          | 100% | -     | 50%   | -    | -    |
| Median Ki-67%               | 95%          | 99%  | 85%   | 100%  | 85%  | 30%  |

§ List of other immunohistochemistry markers that have been utilized to establish the diagnosis: BOB1, CAM5.2, CD1a, CD3, CD4, CD5, CD10, CD15, CD19, CD20, CD21, CD22, CD23, CD25, CD27, CD34, CD35, CD38, CD43, CD45 (LCA), CD57, CD68, CD79a,

CD79b, CD99, CD103, CD117, CD123, CD138, CD200, cMYC, cyclinD1, DBA44, desmin, EBER1/2, EMA, EZH2, FMC7, HHV8, Ig, IRF4/MUM1, MNF116, MPO, myogenin, NSE, OCT2, p63, PAX5, S100, SMA, TCL1, TdT, vimentin; The relapsed BL case was CD10+, CD19+, CD20+, BCL6+ and cMYC+ (confirmed with FISH for *MYC::IGH*; Ki-67 100%); IRF4/MUM1 was positive only in one PMBCL and one DLBCL patient.

**Table S2.** Reference values for blood chemistry work-up presented in Table 2.

| Work-up | Normal range                                                                                                                                                                                                   |
|---------|----------------------------------------------------------------------------------------------------------------------------------------------------------------------------------------------------------------|
| LDH     | Birth to 14 days: 309 – 1222 U/L<br>15 days to <1 year: 163 – 452 U/L<br>1 to <10 years: 192 – 321 U/L                                                                                                         |
| ESR     | Children: 0 – 10 mm/hr<br>Female adolescents and young adults: 0 – 20 mm/hr<br>Male adolescents and young adults: 0 – 15 mm/hr                                                                                 |
| CRP     | Birth to 14 days: 0.03 – 0.61 mg/dL<br>15 days to <15 years: 0.01 – 0.1 mg/dL<br>15 to <19 years: 0.01 – 0.17 mg/dL                                                                                            |
| AST     | Birth to 14 days: 32 – 162 U/L<br>15 days to <1 year: 20 – 67 U/L<br>1 to <7 years: 21 – 44 U/L<br>7 to <12 years: 18 – 36 U/L<br>12 to <19 years (female): 13 – 26 U/L<br>12 to <19 years (male): 14 – 35 U/L |
| ALT     | Birth to <1 year: 5 – 33 U/L<br>1 to <13 years: 9 – 25 U/L                                                                                                                                                     |

|            |                                                                                                                                                                                                                                                                                        |
|------------|----------------------------------------------------------------------------------------------------------------------------------------------------------------------------------------------------------------------------------------------------------------------------------------|
|            | 13 to 19 years (female): 8 – 22 U/L<br>13 to 19 years (male): 9 – 24 U/L                                                                                                                                                                                                               |
| GGT        | Birth to 14 days: 23 – 219 U/L<br>15 days to <1 year: 8 – 127 U/L<br>1 to <11 years: 6 – 16 U/L<br>11 to <19 years: 7 – 21 U/L                                                                                                                                                         |
| Albumin    | Birth to 14 days: 3.3 – 4.5 g/dL<br>15 days to <1 year: 2.8 – 4.7 g/dL<br>1 to <8 years: 3.8 – 4.7 g/dL<br>8 to <15 years: 4.1 – 4.8 g/dL<br>15 to <19 years (female): 4.0 – 4.9 g/dL<br>15 to <19 years (male): 4.1 – 5.1 g/dL                                                        |
| Creatinine | Birth to 14 days: 0.32 – 0.92 mg/dL<br>15 days to <2 years: 0.1 – 0.36 mg/dL<br>2 to <5 years: 0.2 – 0.43 mg/dL<br>5 to <12 years: 0.31 – 0.61 mg/dL<br>12 to <15 years: 0.45 – 0.81 mg/dL<br>15 to <19 years (female): 0.49 – 0.84 mg/dL<br>15 to <19 years (male): 0.62 – 1.08 mg/dL |
| C3         | Cord blood (term): 57 – 116 mg/dL<br>1 month: 53 – 124 mg/dL<br>2 months: 59 – 149 mg/dL<br>3 months: 64 – 131 mg/dL<br>4 months: 62 – 175 mg/dL<br>5 months: 64 – 167 mg/dL<br>6 months: 74 – 171 mg/dL                                                                               |

|                              |                                                                                                                                                                                                                                                                                                                                                                                                                                                |
|------------------------------|------------------------------------------------------------------------------------------------------------------------------------------------------------------------------------------------------------------------------------------------------------------------------------------------------------------------------------------------------------------------------------------------------------------------------------------------|
|                              | 7 to 9 months: 75 – 166 mg/dL<br>10 to 12 months: 73 – 180 mg/dL<br>1 year: 84 – 174 mg/dL<br>2 years: 81 – 170 mg/dL<br>3 years: 77 – 171 mg/dL<br>4 to 5 years: 86 – 166 mg/dL<br>6 to 8 years: 88 – 155 mg/dL<br>9 to 10 years: 89 – 195 mg/dL<br>Young adults: 83 – 177 mg/dL                                                                                                                                                              |
| Cystatin-C                   | Birth to <2 years (female): 0.682 – 1.218 mg/L<br>Birth to <2 years (male): 0.666 – 1.262 mg/L<br>2 to <11 years (female): 0.654 – 1.074 mg/L<br>2 to <11 years (male): 0.651 – 1.075 mg/L<br>11 to <15 years (female): 0.64 – 1.132 mg/L<br>11 to <15 years (male): 0.684 – 1.196 mg/L<br>15 to 18 years (female): 0.597 – 1.029 mg/L<br>15 to 18 years (male): 0.706 – 1.174 mg/L                                                            |
| Platelet-to-lymphocyte ratio | According to<br>Moosmann, J., Krusemark, A., Dittrich, S., Ammer, T., Rauh, M., Woelfle, J., Metzler, M., & Zierk, J. (2022). Age- and sex-specific pediatric reference intervals for neutrophil-to-lymphocyte ratio, lymphocyte-to-monocyte ratio, and platelet-to-lymphocyte ratio. International journal of laboratory hematology, 44(2), 296–301. <a href="https://doi.org/10.1111/ijlh.13768">https://doi.org/10.1111/ijlh.13768</a> [38] |
| Lymphocyte-to-monocyte ratio |                                                                                                                                                                                                                                                                                                                                                                                                                                                |
